# Supplementary material for: Structure effects of Pt15 clusters for the oxygen reduction reaction: first-principles calculations
Source: Royal Society of Chemistry journal article supplement (doi:10.1039/d2cp05188e), 2023-01-01
Supplement: d2cp05188e1.pdf [file d2cp05188e1.pdf]

Table S1. Calculated Gibbs free energies of  $\text{Pt}_{15}$  and  $\text{Pt}_{15}^-$ , change in Gibbs free energies for the reduction process in gas-phase, solvation free energies, final change in Gibbs free energies of solution based on the Born-Haber cycle, values in kcal/mol. In addition, absolute and SHE referenced reduction potential are given in eV.

|                    | $G_{(g)}$ | $G_{(solv)}$ | $\Delta G_{(g)}$ | $\Delta G_{solv(0)}$ | $\Delta G_{solv(-1)}$ | $\Delta G_{(solv)}$ | $E_{0/-1}$ (abs) | $E_{0/-1}$ (SHE) |
|--------------------|-----------|--------------|------------------|----------------------|-----------------------|---------------------|------------------|------------------|
| $\text{Pt}_{15}^-$ | -1679.46  | -1726.64     | -74.75           |                      | -47.18                | -108.95             | 4.724            | 0.443            |
| $\text{Pt}_{15}$   | -1604.71  | -1617.69     |                  | -12.98               |                       |                     |                  |                  |
